# Supplementary material for: Age, not growth, explains larger body size of Pacific cod larvae during recent marine heatwaves
Source: PubMed Central journal article supplement — Sci Rep. 2024 Aug 20;14:19313. doi: 10.1038/s41598-024-69915-1 (PMC11336165; doi:10.1038/s41598-024-69915-1), 2024-08-20
Supplement: 41598_2024_69915_MOESM1_ESM.pdf [file 41598_2024_69915_MOESM1_ESM.pdf]

## **SUPPLEMENTARY INFORMATION**

### **Age, not growth, explains larger body size of Pacific cod larvae during recent marine heatwaves**

Jessica A. Miller<sup>1</sup>, L. Zoe Almeida<sup>1</sup>, Lauren A. Rogers<sup>2</sup>, Hillary L. Thalmann<sup>1</sup>, Rebecca M. Forney<sup>1</sup>, and Benjamin J. Laurel<sup>3</sup>

Coastal Oregon Marine Experiment Station, Hatfield Marine Science Center, Department of Fisheries, Wildlife, and Conservation Sciences, Oregon State University, 2030 SE Marine Science Drive, Newport, Oregon 97365, USA

<sup>2</sup>Recruitment Processes Program, Resource Assessment and Conservation Engineering Division, Alaska Fisheries Science Center, National Marine Fisheries Service, NOAA, Seattle, WA, USA

<sup>3</sup>Fisheries Behavioral Ecology Program, Resource Assessment and Conservation Engineering Division, Alaska Fisheries Science Center, National Marine Fisheries Service, NOAA, Hatfield Marine Science Center, Newport, OR 97365, USA

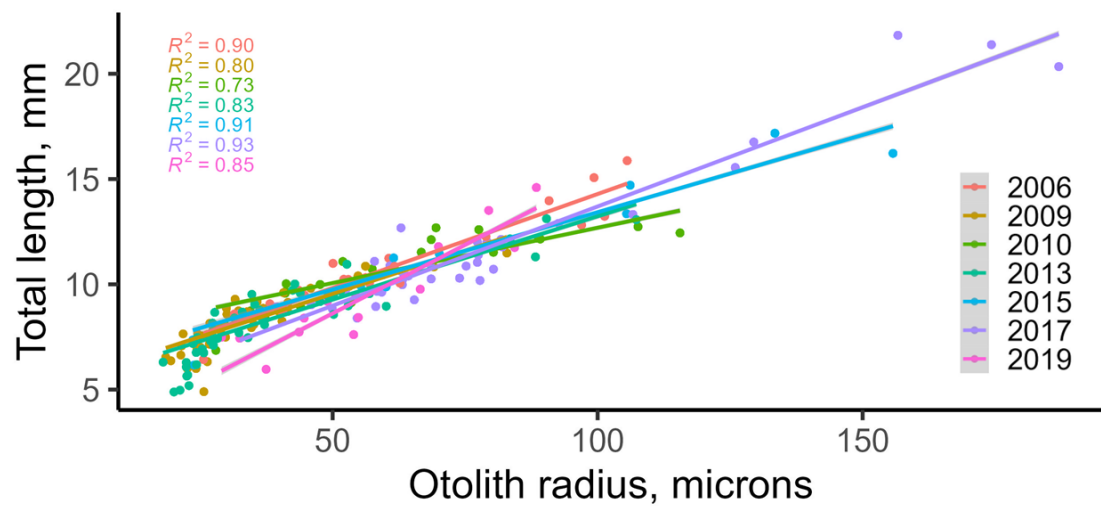

Figure S1. Total length (mm) by otolith radius at capture (microns) for larvae collected in 2006, 2009, 2010, 2013, 2015, 2017, 2019. Simple linear model fits are included for reference.

**Table S1.** ANOVA results (Type III sum of squares) for the model to predict hatch date based on fixed effects of marine heatwave status and random effect of year of capture and station.

| Term                       | Value (SE)    | t-value | $\chi^2_{df}$      |
|----------------------------|---------------|---------|--------------------|
| Intercept                  | 125.30 (3.64) | 34.48   | 1183 <sub>1</sub>  |
| MHW (referenced to Before) | -18.54 (5.61) | -3.31   | 10.93 <sub>1</sub> |

**Table S2.** Mean (SD) temperature in January through April at the surface (0 to 30 m,  $T_{J-A,SST}$ ) and at depth (100 to 250 m,  $T_{J-A, 100-250\text{ m}}$ ) and mean (SD) temperature during incubation of Pacific Cod larvae based (Incubation Temp). Data are from GAK1 (<http://research.cfos.uaf.edu/gak1/data/>).

| <b>Year</b> | <b><math>T_{J-A, SST}</math></b> | <b><math>T_{J-A, 100-250\text{ m}}</math></b> | <b>Incubation Temp</b> |
|-------------|----------------------------------|-----------------------------------------------|------------------------|
| 2006        | 4.83 (0.39)                      | 5.51 (0.47)                                   | 5.17 (0.08)            |
| 2009        | 3.39 (0.42)                      | 4.93 (0.43)                                   | 4.57 (0.02)            |
| 2010        | 4.68 (0.32)                      | 5.73 (0.41)                                   | 5.60 (0.09)            |
| 2013        | 4.08 (0.33)                      | 5.38 (0.27)                                   | 5.10 (0.02)            |
| 2015        | 5.96 (0.51)                      | 6.71 (0.42)                                   | 6.34 (0.18)            |
| 2017        | 4.79 (0.49)                      | 5.97 (0.80)                                   | 5.07 (0.32)            |
| 2019        | 5.67 (0.48)                      | 6.89 (0.29)                                   | 6.64 (0.21)            |

**Table S3.** Linear regression ( $n = 7$ ) between mean annual hatch date and mean temperatures during January to April at 100 to 250 m depth ( $T_{J-A, 100-200\text{m}}$ ). Model terms and their value (SE = standard error) are included with  $t$ -value and  $p$ -value.

| <b>Term</b>                             | <b>Value (SE)</b> | <b><math>t</math>-value</b> | <b><math>p</math>-value</b> |
|-----------------------------------------|-------------------|-----------------------------|-----------------------------|
| Intercept                               | 204.10 (23.11)    | 8.83                        | 0.0003                      |
| Mean temperature ( $^{\circ}\text{C}$ ) | -14.68 (3.91)     | -3.76                       | 0.013                       |

**Table S4.** Results from models to predict size-at-age (TL, mm) based on age and marine heatwave status (MHW) as a fixed effect. Model term and their value (SE = standard error) are included with *t*-value, and *p*-value. Age was scaled for analysis.

| <b>Term</b>                   | <b>Value (SE)</b> | <b><i>t</i>-value</b> | <b><math>\chi^2_{df}</math></b> | <b><i>p</i>-value</b> |
|-------------------------------|-------------------|-----------------------|---------------------------------|-----------------------|
| Intercept                     | 8.66 (0.242)      | 33.70                 | 1282.8 <sub>1</sub>             | <0.0001               |
| Scaled Age, first degree      | 108.81 (0.574)    | 191.98                | 35972.5 <sub>2</sub>            | <0.0001               |
| Scaled Age, second degree     | -7.54 (0.540)     | -13.67                |                                 | <0.0001               |
| MHW (referenced to Before)    | -0.75 (0.377)     | -1.835                | 3.9 <sub>1</sub>                | 0.047                 |
| Scaled Age, first degree:MHW  | -4.02 (2.916)     | -0.934                |                                 | 0.769                 |
| Scaled Age, second degree:MHW | 9.04 (2.008)      | 3.80                  | 26.1 <sub>2</sub>               | <0.0001               |

**Table S5.** Marginal means extracted from linear mixed model to examine size-at-age for larval Pacific cod with year of collection as a random factor before and during & after marine heatwaves (MHWs) in the Gulf of Alaska. Age, days post hatch (dph), predicted total length (TL), and 95% confidence intervals are presented.

| <b>Before MHWs</b> |                     |               | <b>During &amp; after MHWs</b> |                     |               |
|--------------------|---------------------|---------------|--------------------------------|---------------------|---------------|
| <b>Age, dph</b>    | <b>Predicted TL</b> | <b>95% CI</b> | <b>Age, dph</b>                | <b>Predicted TL</b> | <b>95% CI</b> |
| 6                  | 4.24                | 3.76-4.72     | 6                              | 4.16                | 3.43-4.90     |
| 15                 | 7.21                | 6.74-7.69     | 15                             | 6.50                | 5.92-7.08     |
| 20                 | 8.71                | 8.23-9.18     | 20                             | 7.80                | 7.24-8.37     |
| 25                 | 10.11               | 9.63-10.58    | 25                             | 9.12                | 8.56-9.69     |
| 45                 | 14.90               | 14.41-15.48   | 45                             | 14.85               | 14.23-15.47   |

**Table S6.** ANOVA results (Type III sum of squares) for the model to predict age (square-root transformed) based on fixed effects of total length at capture (TL,  $\mu\text{m}$ ) year of capture. Intercept corresponds to 2006 and length at capture = 0.

| <b>Predictor</b>  | <b>Sum of squares</b> | <b><math>F_{\text{dn,dd}}</math></b> | <b>p-value</b> |
|-------------------|-----------------------|--------------------------------------|----------------|
| Intercept         | 2.57                  | 13.81 <sub>1,187</sub>               | 0.0003         |
| Length at capture | 12.64                 | 67.86 <sub>1,187</sub>               | <0.0001        |
| Year              | 6.86                  | 6.14 <sub>6,187</sub>                | <0.0001        |
| Length:Year       | 4.32                  | 3.87 <sub>6,187</sub>                | 0.0011         |
